# Supplementary material
Source: PubMed Central journal article supplement (PMC3882114)
Supplement: NIHMS525846-supplement-Suppl_Table_1.pdf [file NIHMS525846-supplement-Suppl_Table_1.pdf]

| Gene       | Primers for RT-PCR                                                                 | Ta <sup>1</sup> | Reference                                          |
|------------|------------------------------------------------------------------------------------|-----------------|----------------------------------------------------|
| hActin     | TGA CGG GGT CAC CCA CAC TGT GCC CAT CTA<br>CTA GAA GCA TTT GCG GTG GAC GAT GGA GGG | 55              | Stratagene                                         |
| hOct4      | GGA AGG TAT TCA GCC AAA CGA CCA<br>CTC ACT CGG TTC TCG ATA CTG GTT                 | 55              | [16]                                               |
| hNanog     | ACC AGA ACT GTG TTC TCT TCC ACC<br>CCA TTG CTA TTC TTC GGC CAG TTG                 | 55              | [16]                                               |
| hGCM1      | GTG GAC CCC ATG AAG CTC TA<br>GCA GTG ATC CAA ACC CAA GT                           | 55              | [26]                                               |
| hCG        | GTT TCT GCA TGT TCT CCA TTC CGC<br>GTG GAC TCT GAG GTG ACG TTC TTT                 | 58              | [16]                                               |
| hAP        | TCG CCT ACC AGC TCA TGC ATA ACA<br>TCC AGA TGA AGT GGG AGT GCT TGT                 | 55              | Integrated DNA<br>Technologies                     |
| hβ2M       | TGT CTG GGT TTC ATC CAT CCG ACA<br>TGT GGA GCA ACC TGC TCA GAT ACA                 | 55              | Integrated DNA<br>Technologies                     |
| hAFP       | AGA ACC TGT CAC AAG CTG TG<br>GAC AGC AAG CTG AGG ATG TC                           | 55              | [31]                                               |
| hSox17     | GCC AGC TCC GCG GTA TAT TAC<br>CCT CAC CCC CCC AAA CTG T                           | 58              | [40]                                               |
| hα-MHC     | GGT CAC CAA CAA TCC CTA CG<br>CGC TGC TTC TGC TTG AAC TT                           | 55              | Christoforou, Gearhart<br>(personal communication) |
| hGoosecoid | AGA AGC GGT CCT CAT CAG AG<br>TCG TCT GTC TGT GCA AGT CC                           | 55              | Christoforou, Gearhart<br>(personal communication) |
| hPAX6      | TCA GCA CCA GTG TCT ACC AAC CAA<br>ATC ATA ACT CCG CCC ATT CAC CGA                 | 58              | Integrated DNA<br>Technologies                     |
| hMAP2      | GCA TAT GCG CTG ATT CTT CA<br>CTT TCC GTT CAT CTG CCA TT                           | 55              | [40]                                               |
|            |                                                                                    |                 |                                                    |
| Gene       | Primers for PCR                                                                    | Ta <sup>1</sup> | Reference                                          |
| CMV        | GAT GTA CGG GCC AGA TTT AC<br>CGA TAA GCC AGT AAG CAG TG                           | 53              | Integrated DNA<br>Technologies                     |
| hrGFP      | AAA TGG GCG GTA GGC GTG TAC GGT G<br>AAG GAC AGT GAG AGT GGC AC                    | 56              | Integrated DNA<br>Technologies                     |

Ta<sup>1</sup> = Annealing Temperature

### Supplemental Table 1.
